# Supplementary material for: Sex-Related Differences in Left Atrial Low-Voltage Areas According to CHA2DS2-VA Scores among Patients with Atrial Fibrillation
Source: MDPI journal article supplement (doi:10.3390/jcm11113111), 2022-05-31
Supplement: s1 [file s1]

**Supplementary Table S1.** LVA extension by CHA<sub>2</sub>DS<sub>2</sub>-VA score.

| CHA <sub>2</sub> DS <sub>2</sub> -VA score | 0              | 1              | 2              | 3 or 4          | 5                |       |
|--------------------------------------------|----------------|----------------|----------------|-----------------|------------------|-------|
|                                            | (n=244)        | (n=156)        | (n=97)         | (n=52)          | (n=4)            |       |
| Proportion of LVAs,<br>(%)                 | 9.1 [4.8–15.9] | 9.8 [5.4–15.3] | 9.1 [5.8–17.3] | 12.0 [5.4–16.4] | 19.1 [17.0–36.5] | 0.198 |

LVAs; Low-voltage areas

**Supplementary Table S2.** Difference between sexes according to low-voltage area proportions by CHA<sub>2</sub>DS<sub>2</sub>-VA scores.

| CHA <sub>2</sub> DS <sub>2</sub> -VA score | Male sex           |                                     | Female sex         |                 | <i>p</i> -value |
|--------------------------------------------|--------------------|-------------------------------------|--------------------|-----------------|-----------------|
|                                            | Number of patients | Proportion of low-voltage areas (%) | Number of patients |                 |                 |
| 0                                          | 200                | 9.3 [4.9–15.9]                      | 44                 | 8.1 [4.8–15.8]  | 0.957           |
| 1                                          | 126                | 10.0 [4.7–15.0]                     | 30                 | 9.4 [5.8–17.8]  | 0.536           |
| 2                                          | 78                 | 8.6 [5.8–14.8]                      | 19                 | 9.6 [6.5–26.9]  | 0.398           |
| 3 or 4                                     | 36                 | 10.1 [4.7–15.1]                     | 16                 | 15.8 [9.2–32.1] | 0.027           |
| 5                                          | 4                  | 19.1 [17.0–36.5]                    | 0                  |                 |                 |

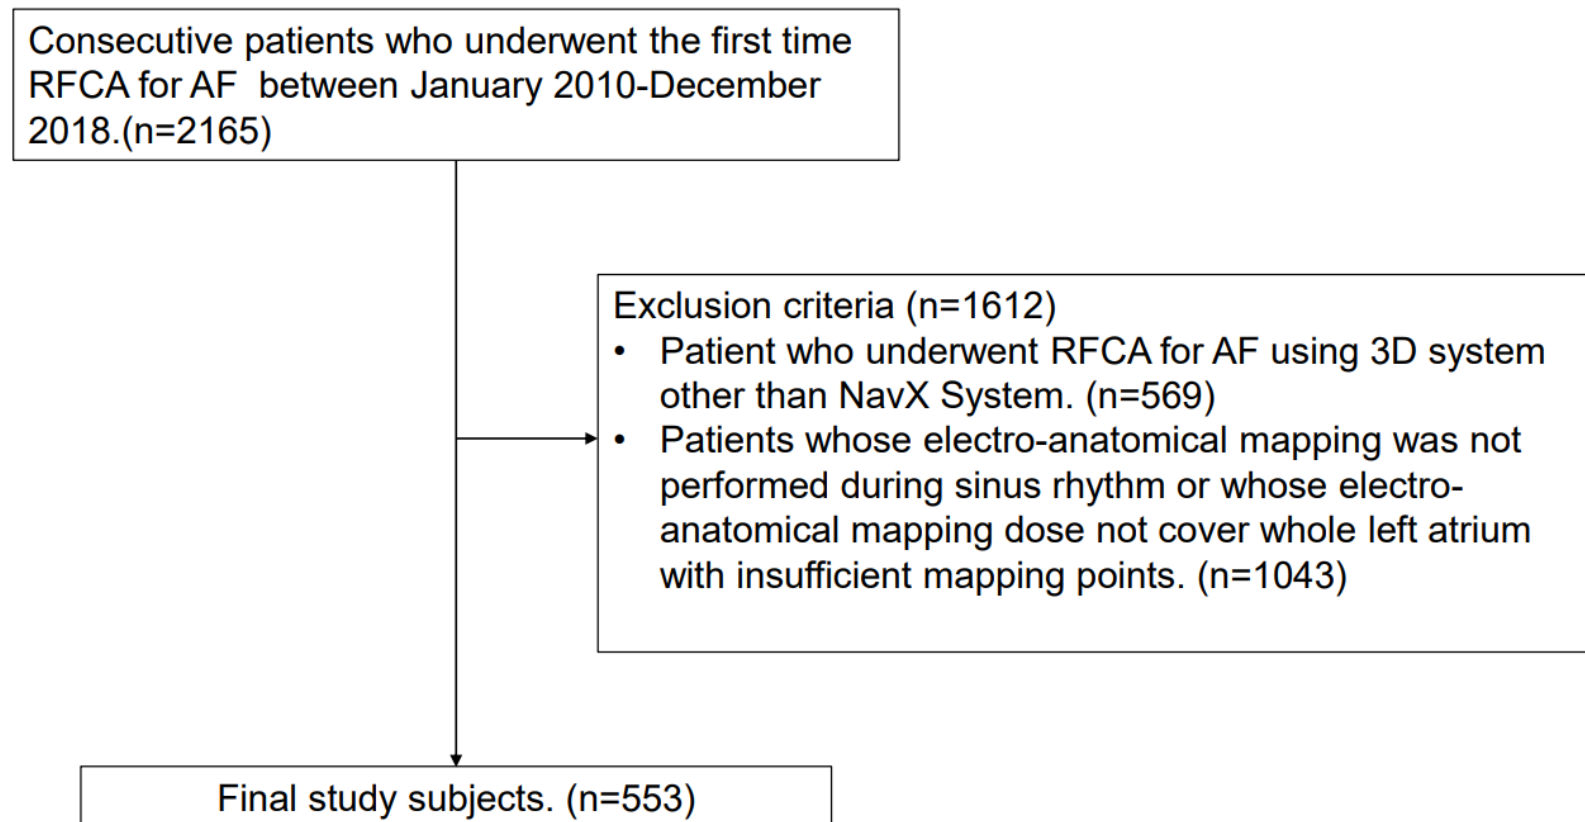

**Supplemental Figure S1.** Flow chart for study enrollment.
